# Supplementary material for: The pleiotropic functions of intracellular hydrophobins in aerial hyphae and fungal spores
Source: PubMed Central journal article supplement (PMC8635391; doi:10.1371/journal.pgen.1009924), 2021-11-17

**Supporting Information S11 Fig. Full size TEM micrographs used for the photoplate in Fig 3.**

Representative TEM micrographs showing the hyphal ultrastructure of strains including the wild-type strain of *T. guizhouense* (Tg), HFB2::mRFP-overexpressing strains of Tg, HFB4-overexpressing *T. harzianum* (Th), or hyphae of Tg and Th lacking HFB4 and HFB10. All images of the aerial hyphae were obtained from a two-day-old colony. Representative images were selected from a total of 695 images obtained for Tg (361) and Th (334). Samples for TEM were prepared with at least two mutants and 30 images studied per genotype. Mutants are listed in Table 2.

Tg

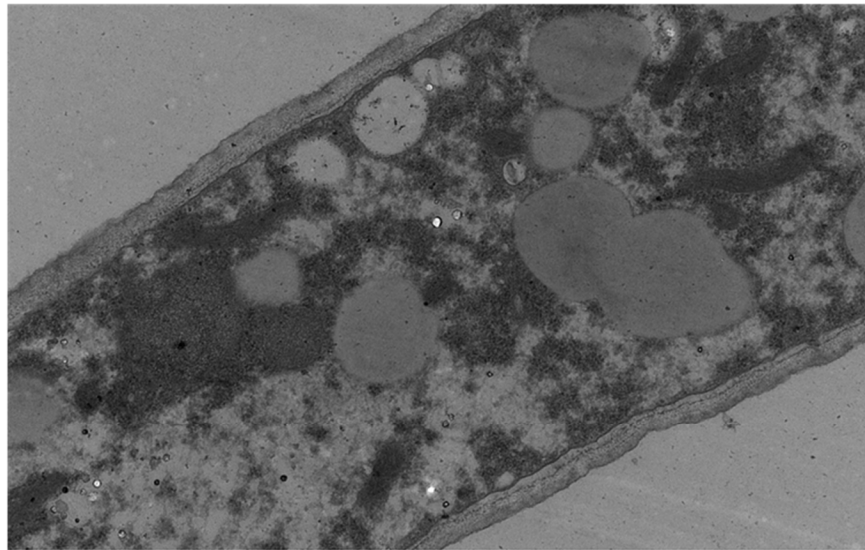

e2\_005  
Print Mag: 981x @ 7 mm  
14:23:33 3/5/2018

Camera: XR16, Exposure: 800 (ms) x 1 std. frames, Gain: 1, Bin: 1

300 nm  
HV: 80.0kV  
Direct Mag: 8000x  
AMT Camera System

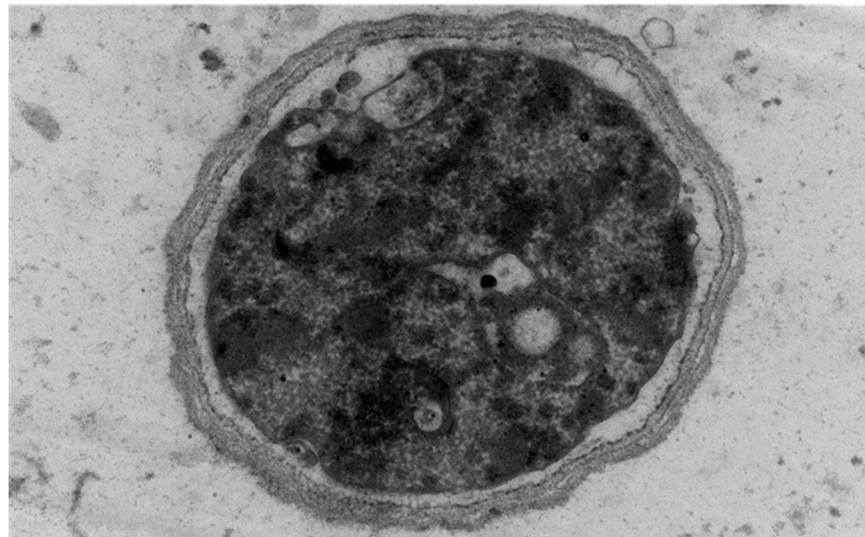

e2\_006  
Print Mag: 1860x @ 7 mm  
14:22:39 3/5/2018

Camera: XR16, Exposure: 800 (ms) x 1 std. frames, Gain: 1, Bin: 1  
Gamma: 1.00, No Sharpening, Normal Contrast

400 nm  
HV: 80.0kV  
Direct Mag: 15000x  
AMT Camera System

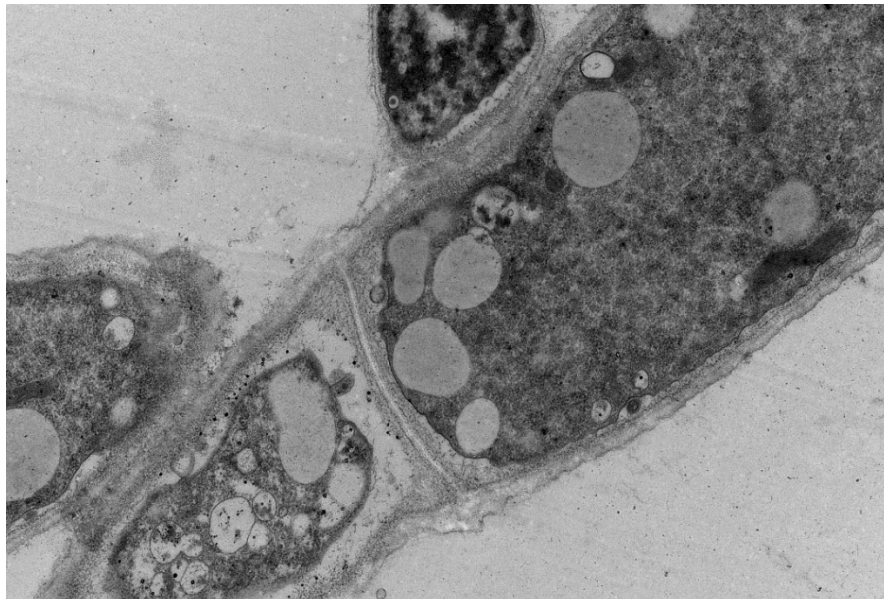

e2\_006  
Print Mag: 862x @ 7 mm  
14:25:46 3/5/2018

1  $\mu$ m  
HV=80.0kV  
Direct Mag: 7000x  
AMT Camera System

Camera: XR16, Exposure: 800 (ms) x 1 std. frames, Gain: 1, Bin: 1  
Gamma: 1.00, No Sharpening, Normal Contrast

T<sub>g</sub>OEhfb2::mrfp

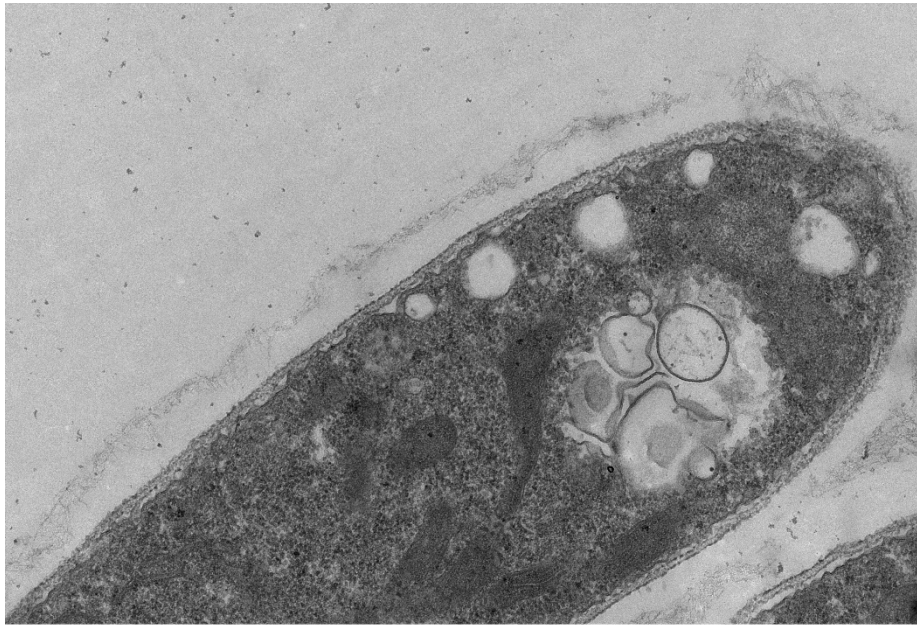

e7\_010  
Print Mag: 1460x @ 7 mm  
15:27:59 3/5/2018

500 nm  
HV=80.0kV  
Direct Mag: 12000x  
AMT Camera System

Camera: XR16, Exposure: 800 (ms) x 1 std. frames, Gain: 1, Bin: 1  
Gamma: 1.00, No Sharpening, Normal Contrast

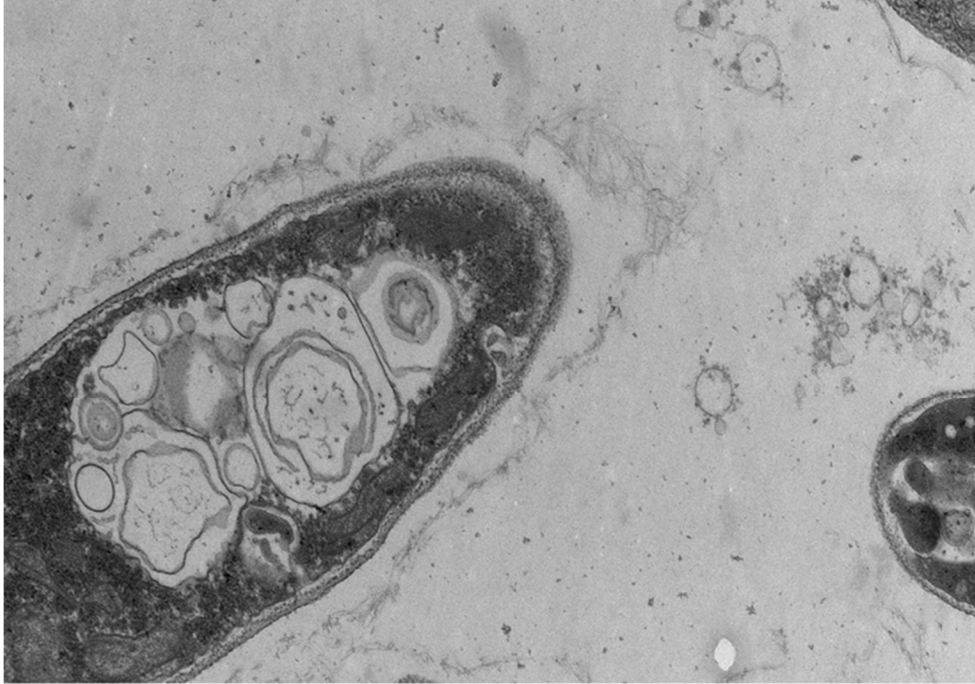

e7\_006  
Print Mag: 1210x @ 7 mm  
15:23:44 3/5/2018

600 nm  
HV=80.0kV  
Direct Mag: 10000x  
AMT Camera System

Camera: XR16, Exposure: 800 (ms) x 1 std. frames, Gain: 1, Bin: 1  
Gamma: 1.00, No Sharpening, Normal Contrast

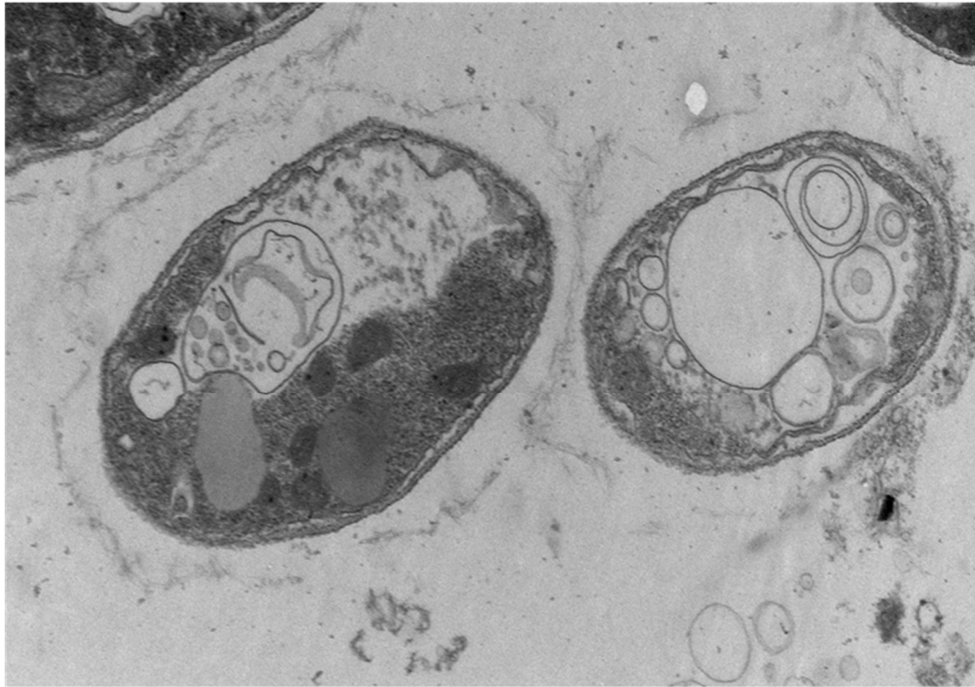

e7\_005  
Print Mag: 1210x @ 7 mm  
15:23:16 3/5/2018

600 nm  
HV=80.0kV  
Direct Mag: 10000x  
AMT Camera System

Camera: XR16, Exposure: 800 (ms) x 1 std. frames, Gain: 1, Bin: 1  
Gamma: 1.00, No Sharpening, Normal Contrast

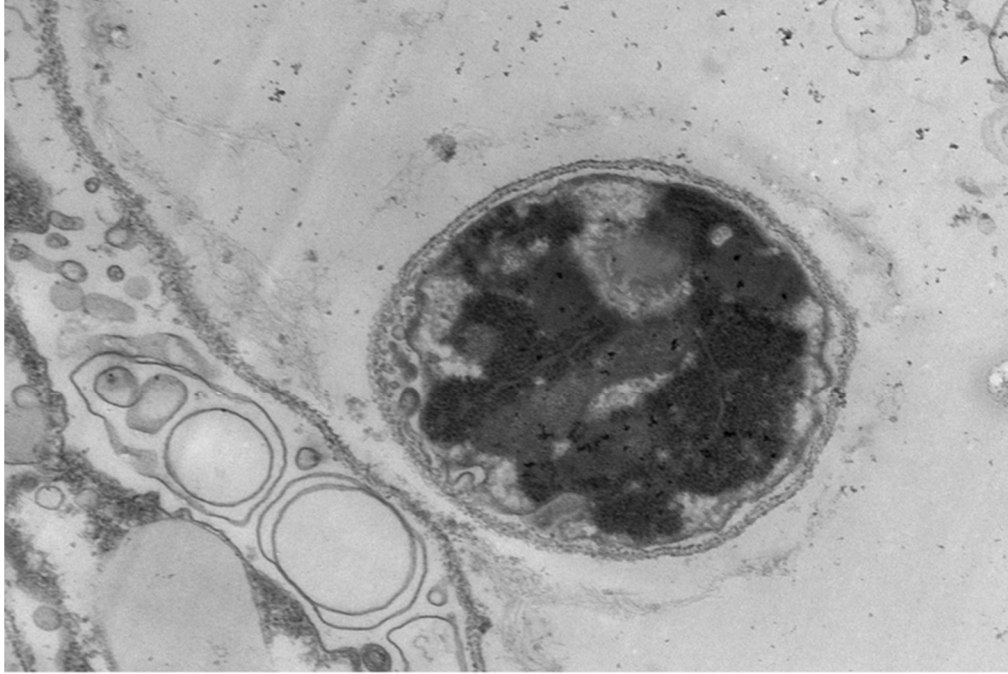

e7\_011  
Print Mag: 1460x @ 7 mm  
15:28:43 3/5/2018

500 nm  
HV=80.0kV  
Direct Mag: 12000x  
AMT Camera System

Camera: XR16, Exposure: 800 (ms) x 1 std. frames, Gain: 1, Bin: 1  
Gamma: 1.00, No Sharpening, Normal Contrast

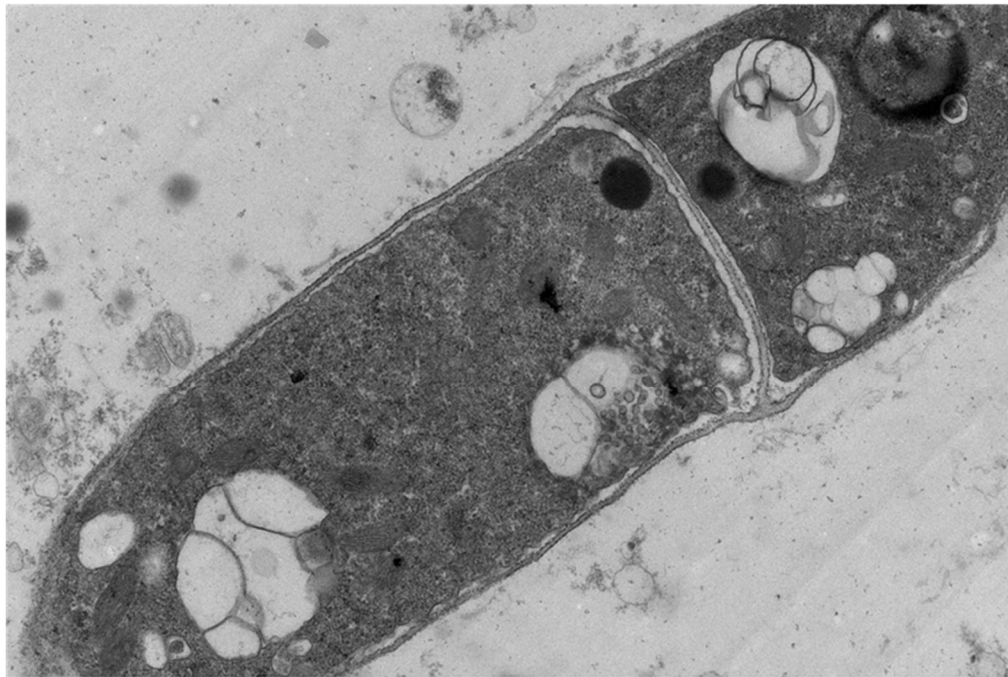

e7\_001  
Print Mag: 981x @ 7 mm  
15:18:54 3/5/2018

800 nm  
HV=80.0kV  
Direct Mag: 8000x  
AMT Camera System

Camera: XR16, Exposure: 800 (ms) x 1 std. frames, Gain: 1, Bin: 1  
Gamma: 1.00, No Sharpening, Normal Contrast

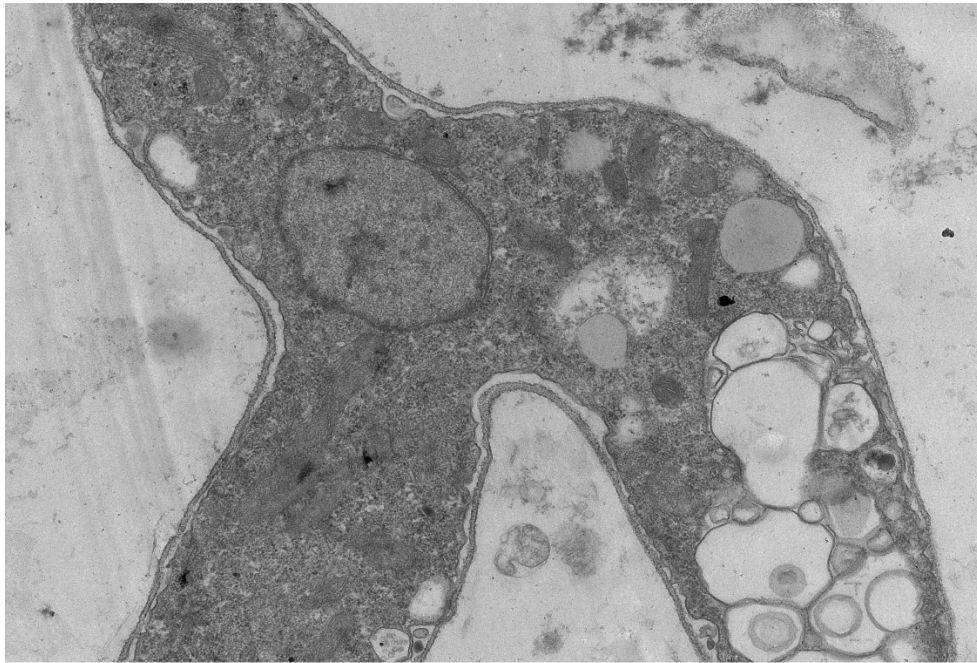

e7\_002  
Print Mag: 862x @ 7 mm  
15:20:00 3/5/2018

1  $\mu$ m  
HV=80.0kV  
Direct Mag: 7000x  
AMT Camera System

Camera: XR16, Exposure: 800 (ms) x 1 std. frames, Gain: 1, Bin: 1  
Gamma: 1.00, No Sharpening, Normal Contrast

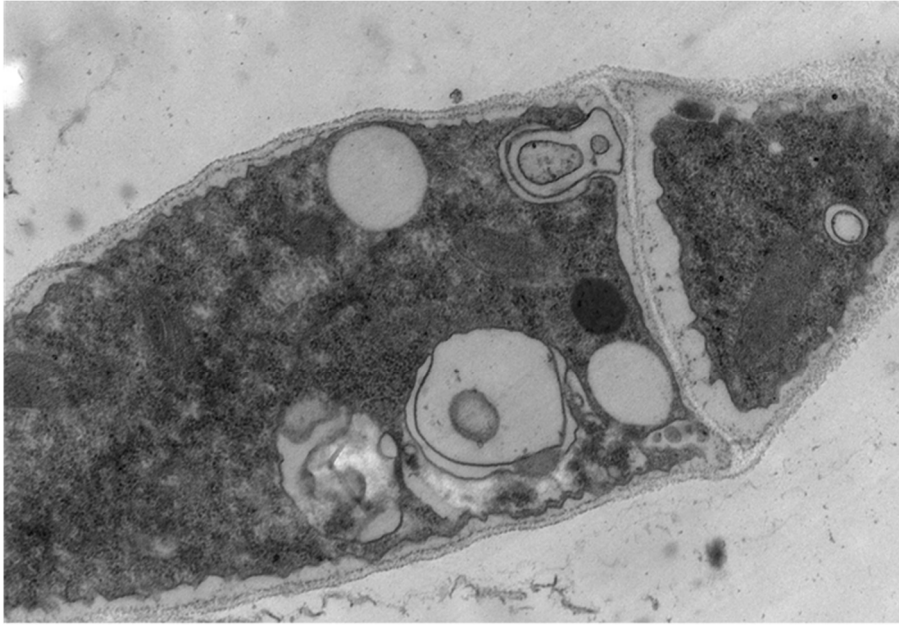

e20\_007  
Print Mag: 1460x @ 7 mm  
11:18:12 3/6/2018

500 nm  
HV=80.0kV  
Direct Mag: 12000x  
AMT Camera System

Camera: XR16, Exposure: 800 [ms] x 1 std. frames, Gain: 1, Bin: 1  
Gamma: 1.00, No Sharpening, Normal Contrast

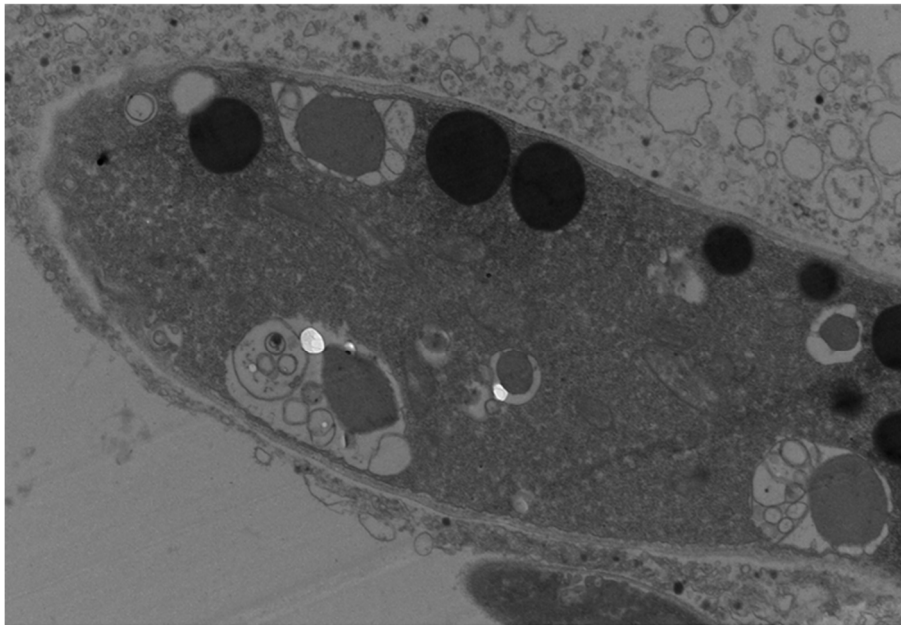

e15\_009  
Print Mag: 737x @ 7 mm  
10:22:01 3/6/2018

1 µm  
HV=80.0kV  
Direct Mag: 6000x  
AMT Camera System

Camera: XR16, Exposure: 800 [ms] x 1 std. frames, Gain: 1, Bin: 1  
Gamma: 1.00, No Sharpening, Normal Contrast

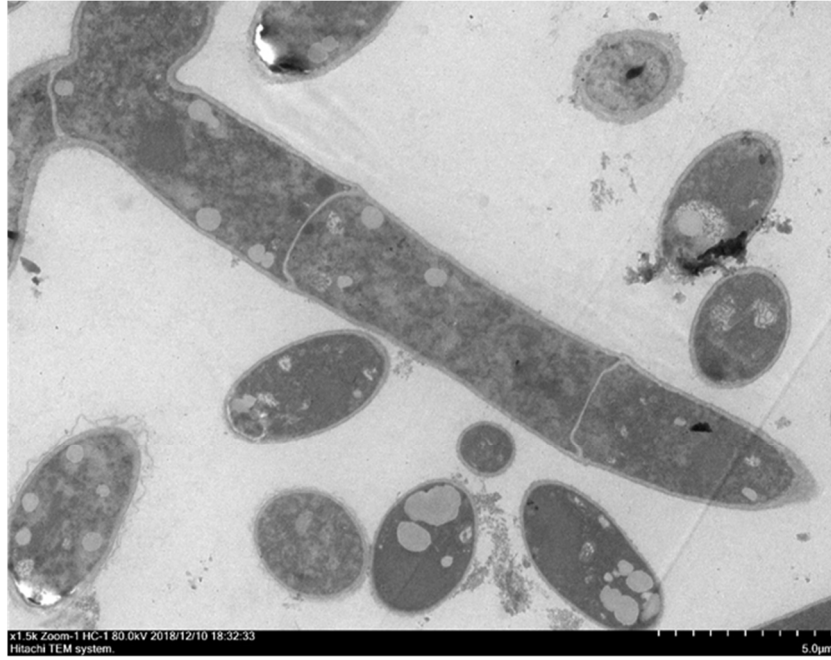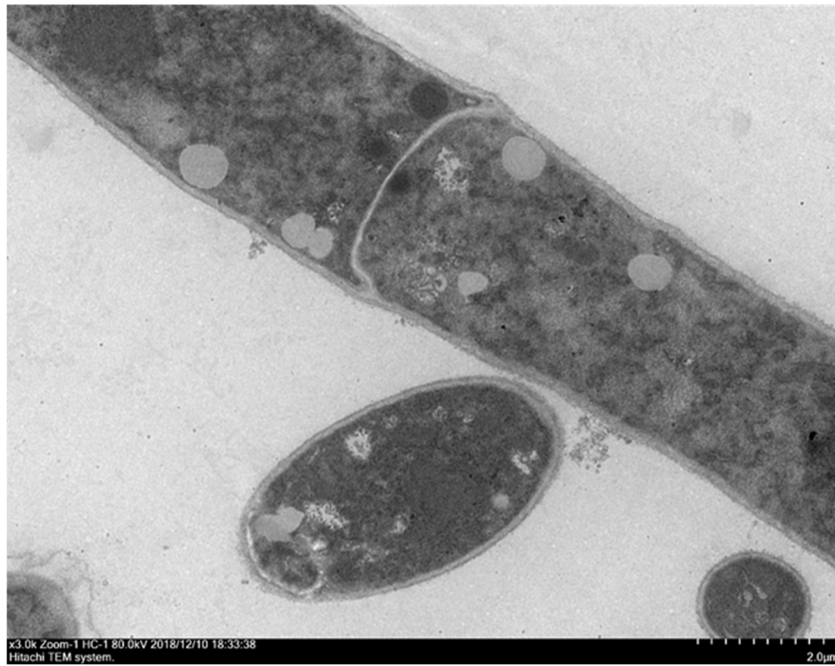

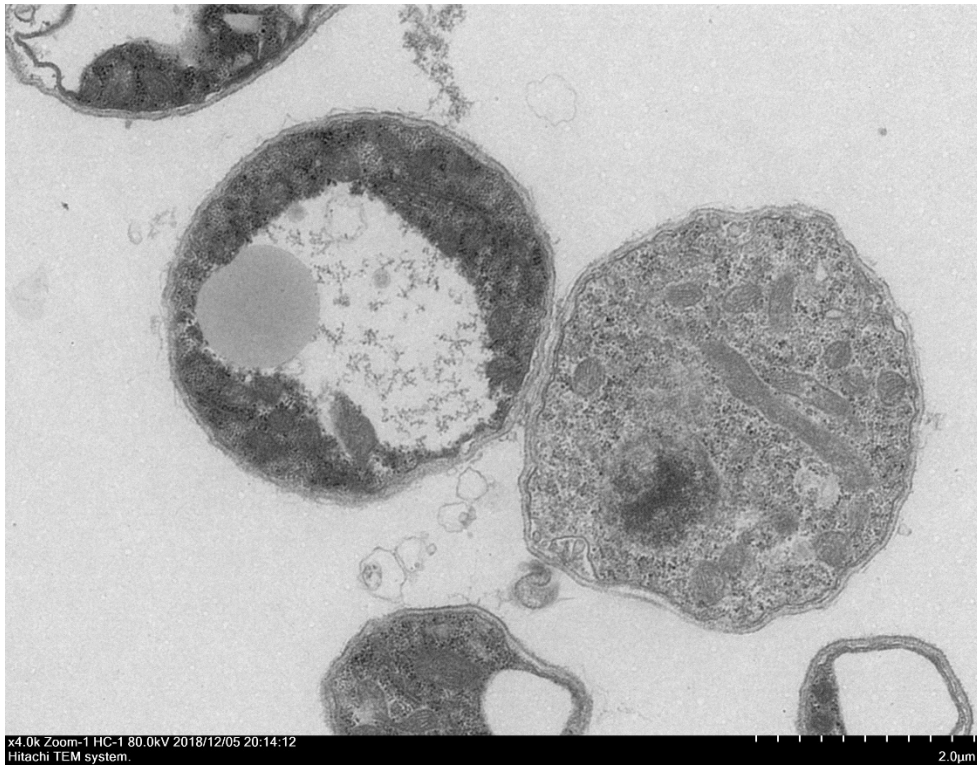

Supplement: pgen.1009924.s011.pdf [file pgen.1009924.s011.pdf]
