# Supplementary material for: The pleiotropic functions of intracellular hydrophobins in aerial hyphae and fungal spores
Source: PubMed Central journal article supplement (PMC8635391; doi:10.1371/journal.pgen.1009924), 2021-11-17
Supplement: pgen.1009924.s001.pdf [file pgen.1009924.s001.pdf]

Supporting Information S1 Fig. Principal component analysis (PCA) of the *hfb* expression pattern during *Trichoderma* development

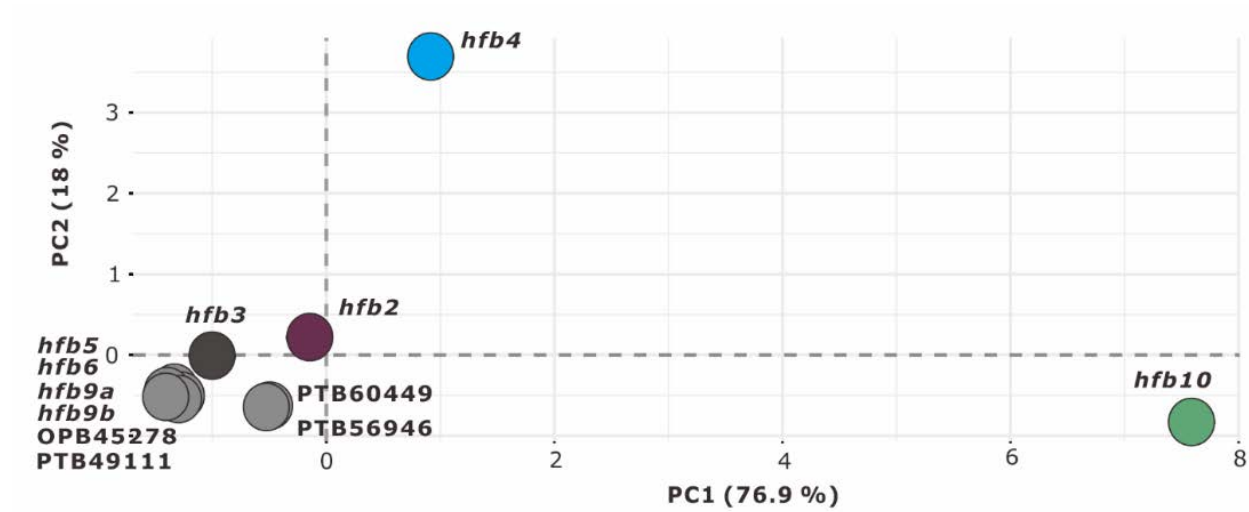

**Fig S1** Principal component analysis (PCA) of the *hfb* expression pattern in *T. harzianum* and *T. guizhouense*. The complete list of *hfb*-encoding genes and their transcriptional profile are given in Table 1.
