# Supplementary material for: The pleiotropic functions of intracellular hydrophobins in aerial hyphae and fungal spores
Source: PubMed Central journal article supplement (PMC8635391; doi:10.1371/journal.pgen.1009924), 2021-11-17
Supplement: pgen.1009924.s004.pdf [file pgen.1009924.s004.pdf]

Supporting Information S4 Fig. Intracellular accumulation of mRFP-labeled HFB4 in conidiophores

$T_g$  *hfb4::mrfp*

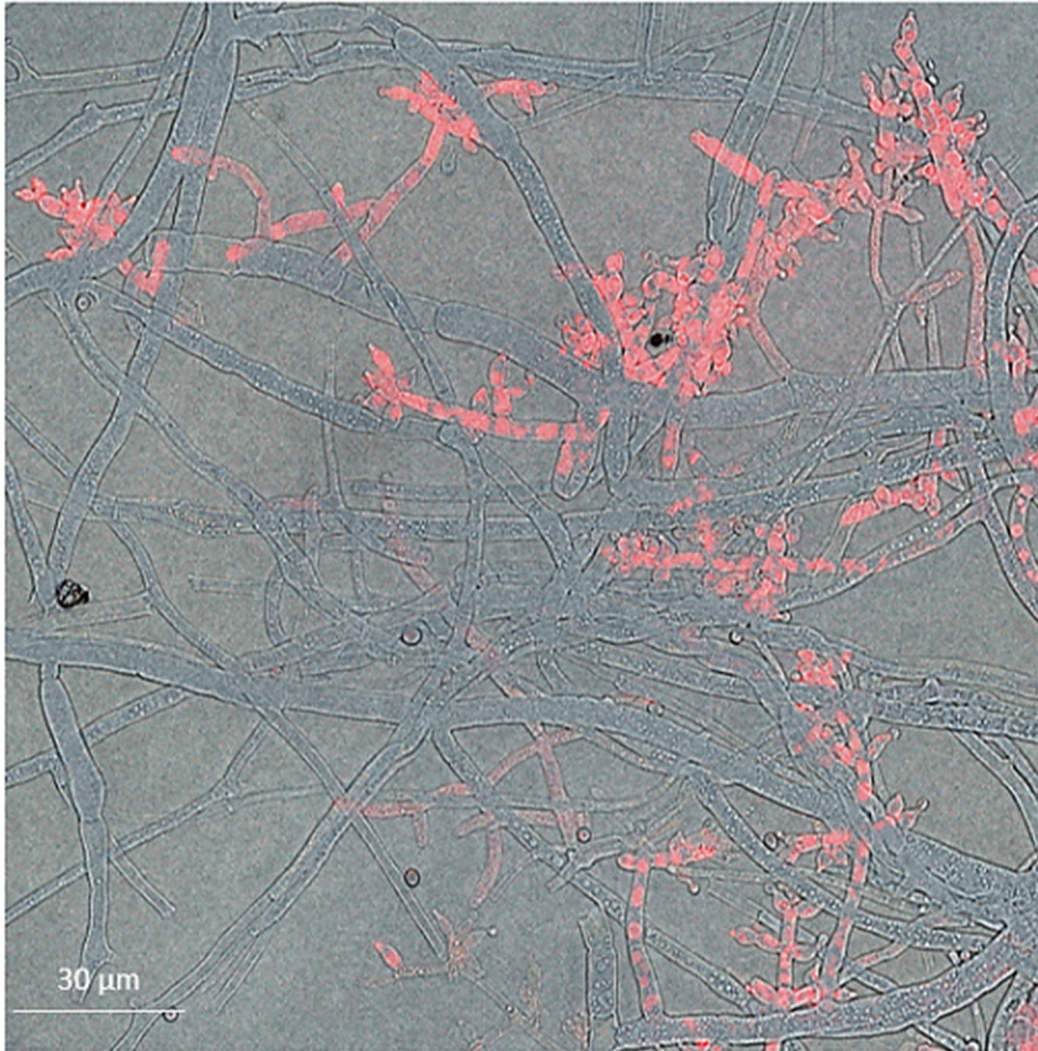

**Fig S4** Intracellular accumulation of mRFP-labeled HFB4 in conidiophores of the  $T_g$  *hfb4::mrfp* mutant cultivated on cellophane-covered PDA at 25 °C in darkness. The cellophane covered by hyphae was observed under an epifluorescence microscope (Leica DMI8 microscope, Germany) without water added.
