# Supplementary material for: The pleiotropic functions of intracellular hydrophobins in aerial hyphae and fungal spores
Source: PubMed Central journal article supplement (PMC8635391; doi:10.1371/journal.pgen.1009924), 2021-11-17
Supplement: pgen.1009924.s005.pdf [file pgen.1009924.s005.pdf]

Supporting Information S5 Fig. Localization of  $T_g$ HFB3::mRFP in vacuole-resembling organelles (white arrows) and on the surface of phialides near the collarette (black arrows).

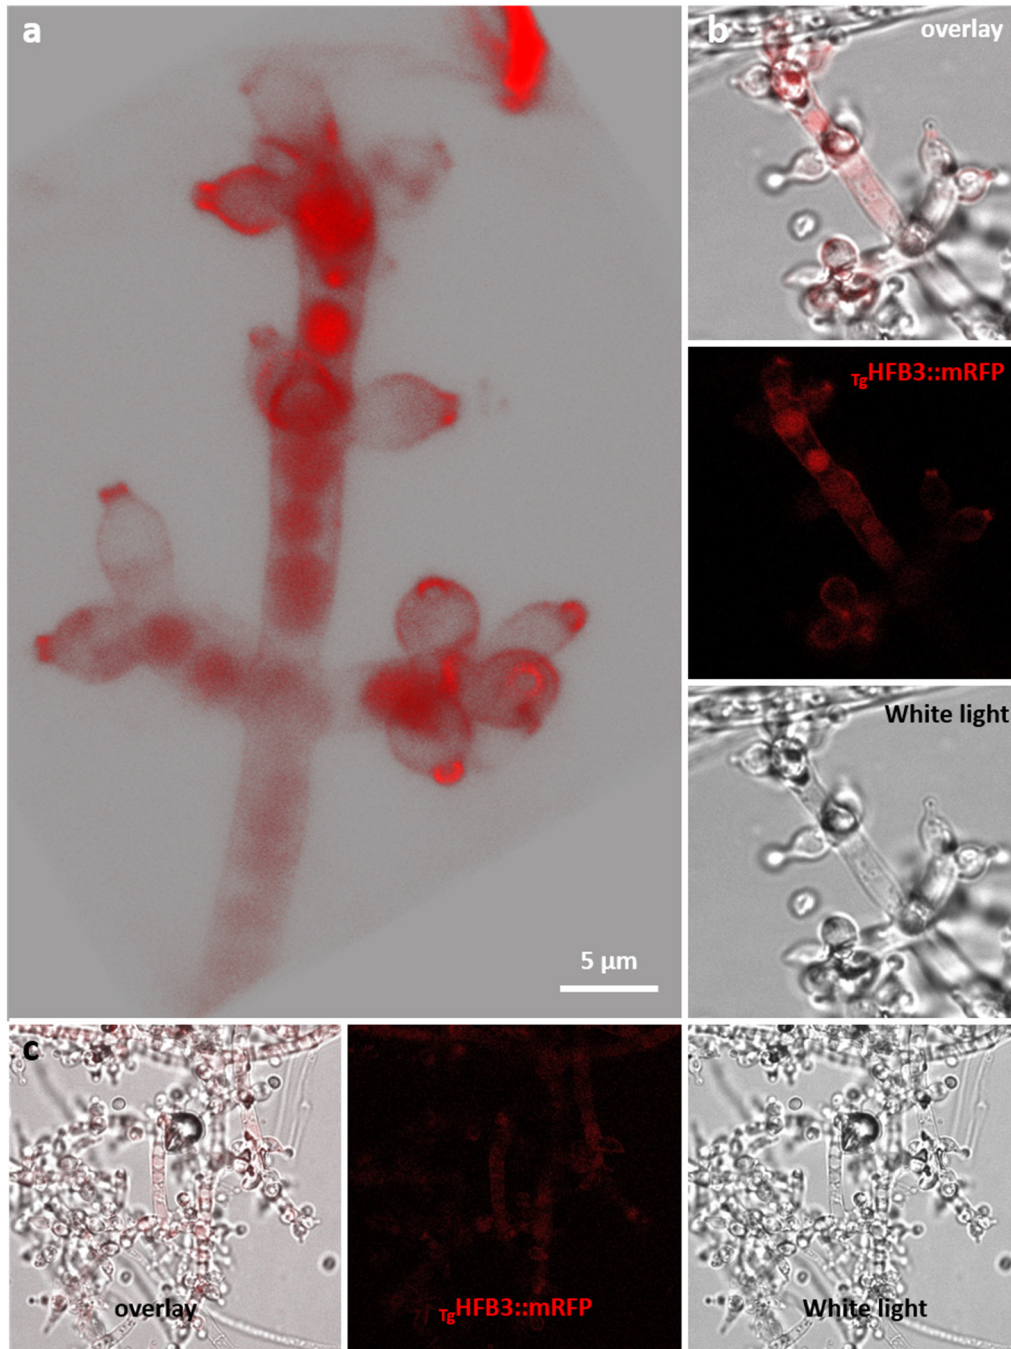

**Fig S5** Localization of  $T_g$ HFB3::mRFP expressed under the control of its native promoter. **A** A 3D reconstruction from the Z stack images of a conidiophore shown in **B**. HFB3::mRFP is seen in vacuole-like organelles inside the conidiophore and on the surface of phialides, in particular in the areas of phialide necks. Spores were not coated by HFB3::mRFP. **C** shows the low level of HFB3 secretion and association with conidiophores.
