# Supplementary material for: The pleiotropic functions of intracellular hydrophobins in aerial hyphae and fungal spores
Source: PubMed Central journal article supplement (PMC8635391; doi:10.1371/journal.pgen.1009924), 2021-11-17
Supplement: pgen.1009924.s006.pdf [file pgen.1009924.s006.pdf]

Supporting Information S6 Fig. Secretion of mRFP expressed using the signal peptide under the control of the promoter of  $T_g hfb4$

$T_g P_{hfb4}::S_{hfb4}::mrfp$

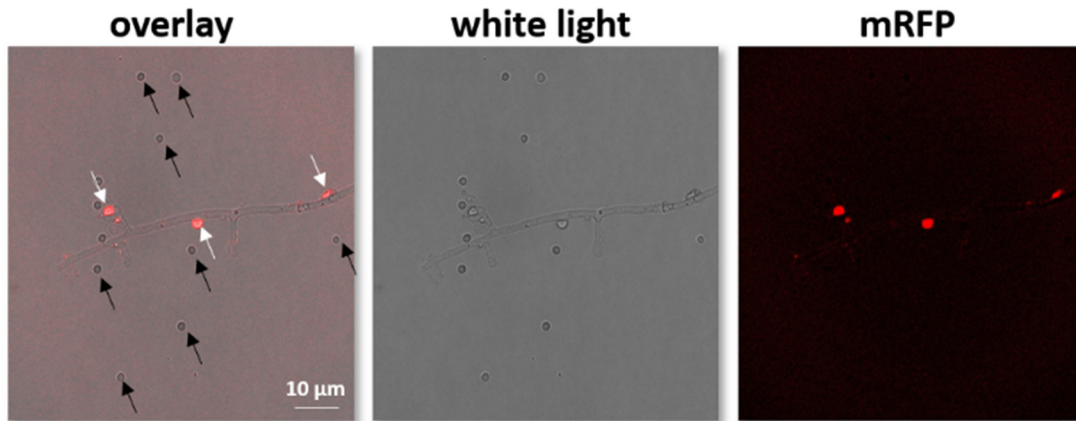

**Fig S6** Secretion of mRFP expressed using the signal peptide and the promoter of the *hfb4* gene from *T. guizhouense* NJAU 4742. Microscopic analysis of the 48 h-old culture grown on PDA at 25 °C in darkness; white arrows point to the water/air interface (on air bubbles); black arrows point to spores, Leica DMI8 microscope (Leica, Germany)

This analysis demonstrates that mRFP has no affinity to intracellular accumulation in *Trichoderma* spp.
