# Supplementary material for: The pleiotropic functions of intracellular hydrophobins in aerial hyphae and fungal spores
Source: PubMed Central journal article supplement (PMC8635391; doi:10.1371/journal.pgen.1009924), 2021-11-17
Supplement: pgen.1009924.s008.pdf [file pgen.1009924.s008.pdf]

Supporting Information S8 Fig. Representative morphology of *Trichoderma* mutants lacking *rab7*

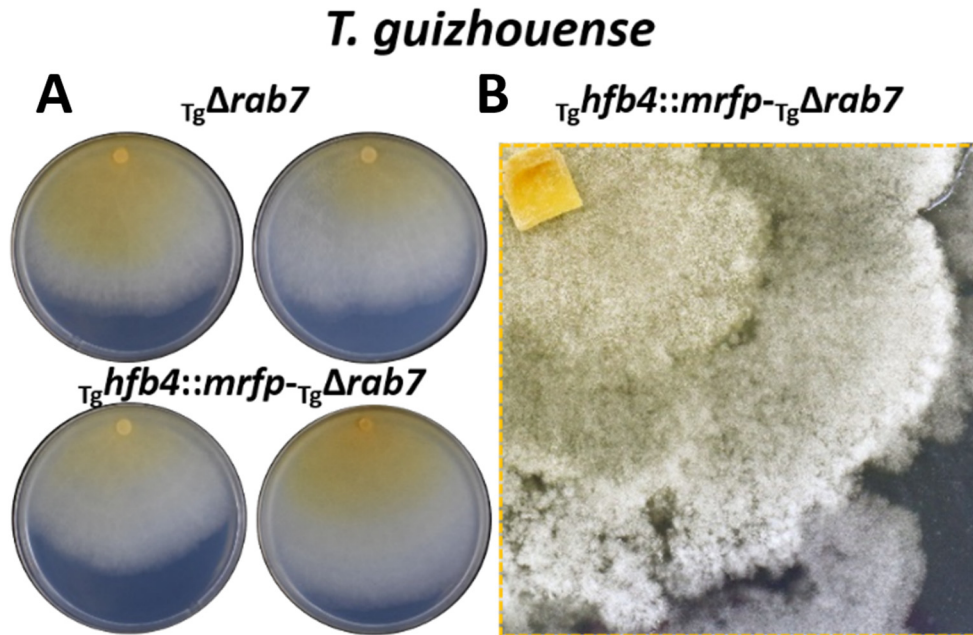

**Fig A** Representative morphology of *Trichoderma*  $\Delta rab7$  mutants (N=2 for each genotype) generated in this study (14 d). **(A)**, *Trichoderma* strains grown on PDA at 25 °C in darkness; **(B)**, a close-up image of the colony cultivated under the same conditions for 14 d.

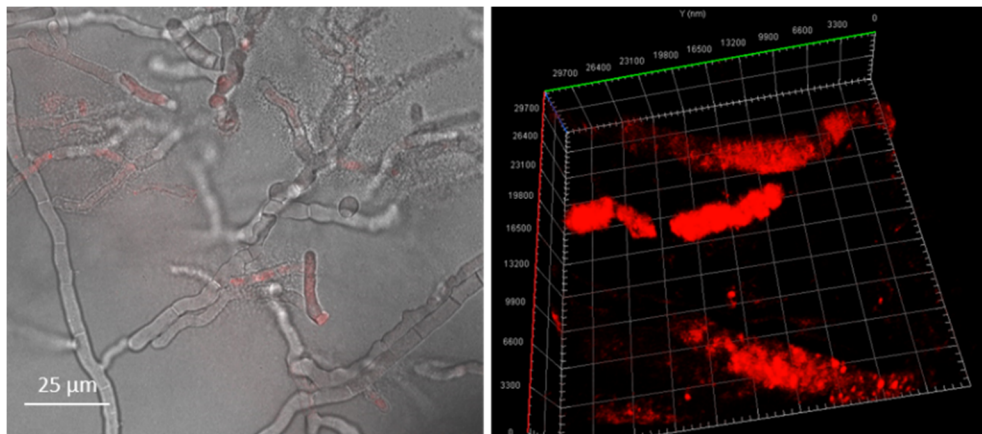

**Fig B** left: Representative morphology of  $T_g hfb4::mrfp-\Delta rab7$  mutants (N=2 for each genotype) observed under an epifluorescence microscope when an agar plug was placed on a cover glass. Right: A fluorescence overlay image is shown on the left, and a 3D reconstruction of the superresolution CLSM image.

*Tg*hfb4::mrfp- $\Delta$ rab7

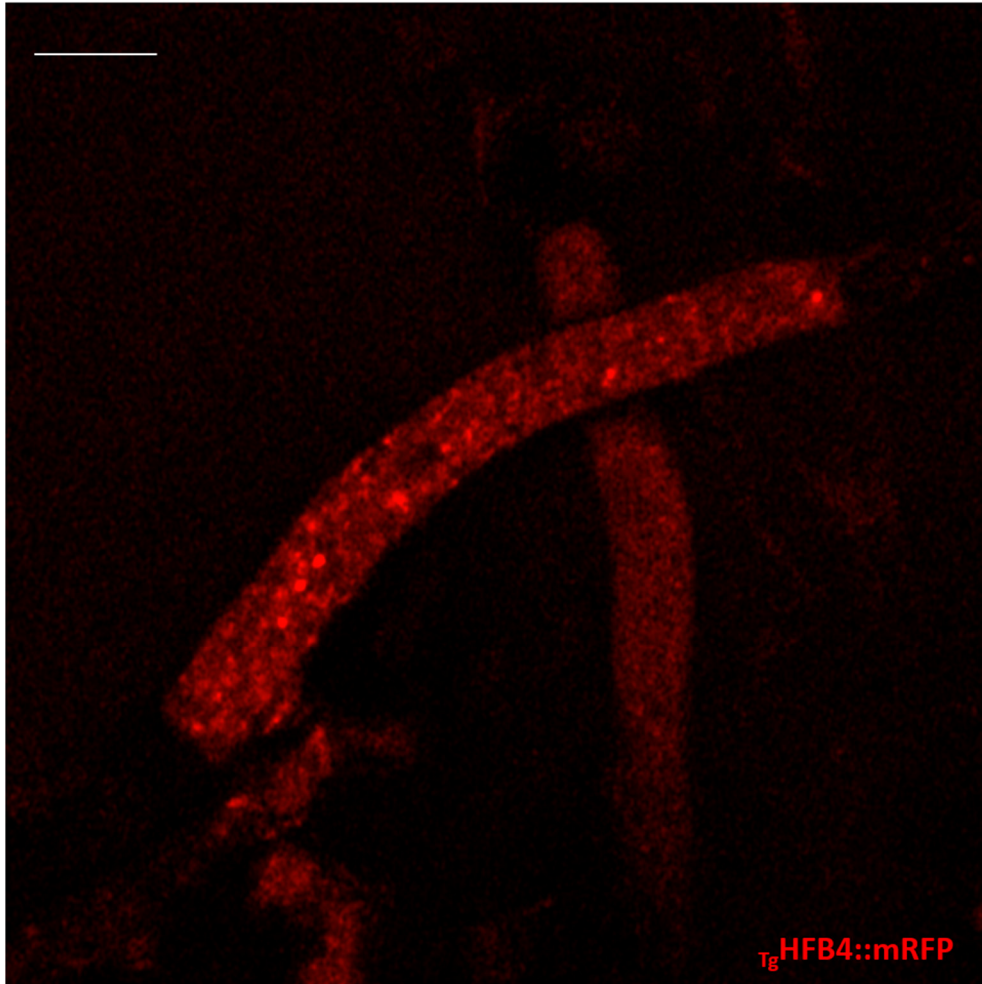

**Fig C** A 3D reconstruction of the aerial hyphae of the *Trichoderma guizhouense* mutant producing HFB4::mRFP but lacking the key protein for the cytoplasm-to-vacuole sorting pathway, RAB7 (homologous to YPT7 in *S. cerevisiae*). Scale bar= 10  $\mu$ m.
