# Supplementary material for: The pleiotropic functions of intracellular hydrophobins in aerial hyphae and fungal spores
Source: PubMed Central journal article supplement (PMC8635391; doi:10.1371/journal.pgen.1009924), 2021-11-17
Supplement: pgen.1009924.s009.pdf [file pgen.1009924.s009.pdf]

Supporting Information S9 Fig. Fluorescent microscopy imaging and ultrastructure of *Trichoderma* spores

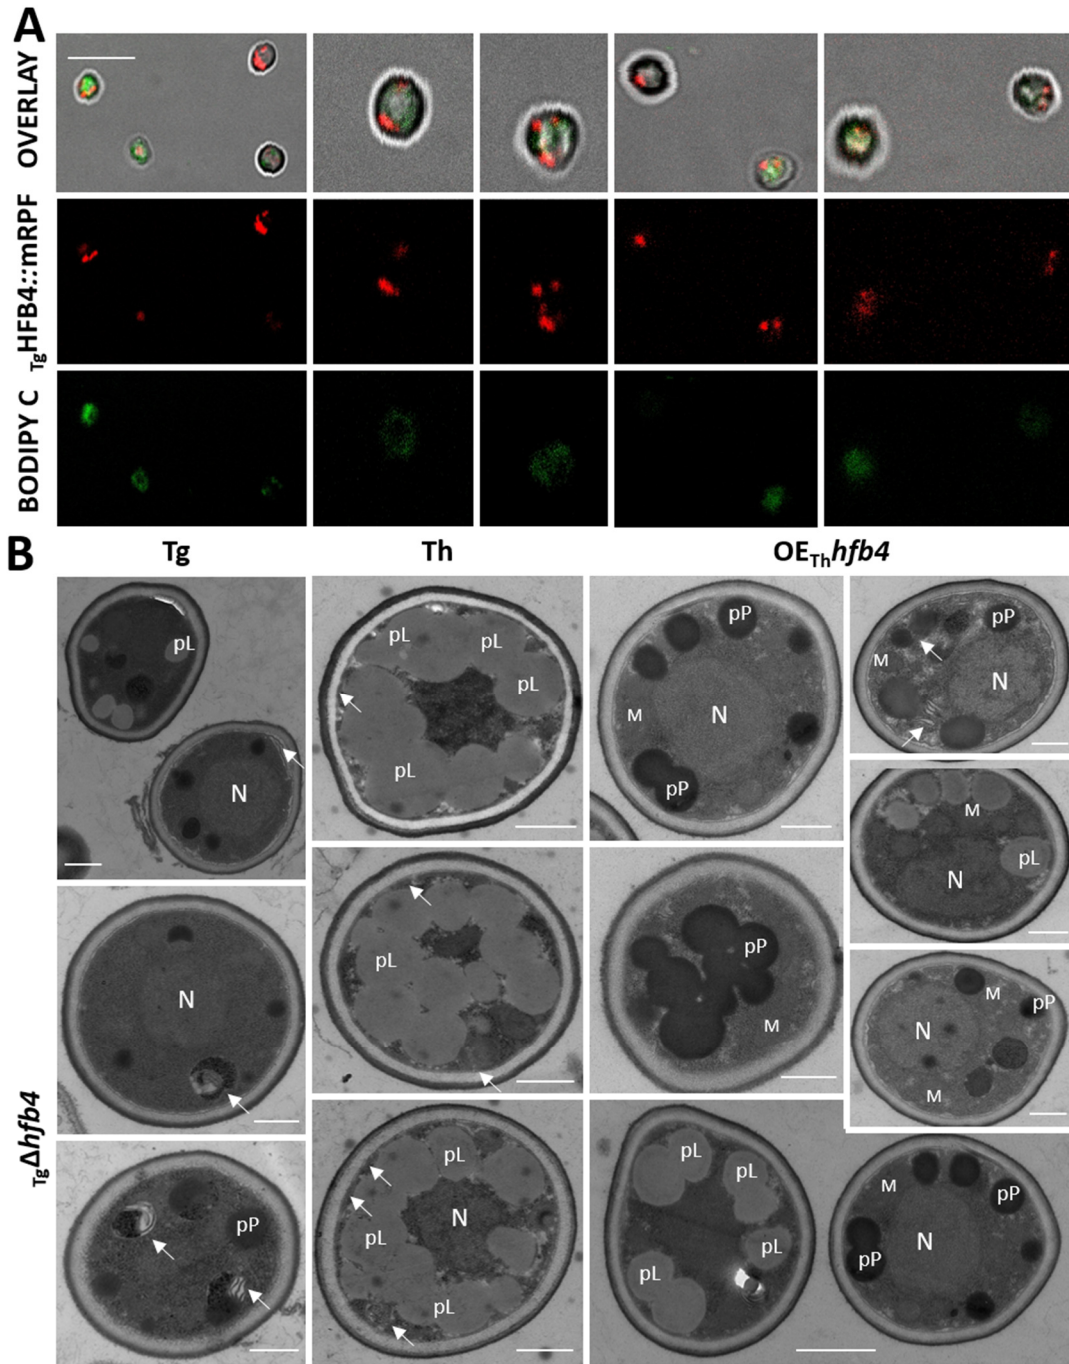

**Fig S9 (A)** Fluorescent images of the phospholipid-specific stained [using a green fluorescent fatty acid (BODIPY<sup>TM</sup> FL C12)] aerial hyphal tips of the *T. guizhouense* mutant producing HFB4::mRFP. Scale bar= 5  $\mu$ m. **(B)** TEM images of mature conidia produced by the wild-type, HFB deletion, and HFB-overexpressing mutants of *Trichoderma* spp. N – nucleus, pL – putative lipid droplet, pP – putative proteinous inclusion, M – mitochondrion. Arrows point to the putative vacuolar multicisternal structures (VMS). Scale bar= 1  $\mu$ m.
