# Supplementary material for: The pleiotropic functions of intracellular hydrophobins in aerial hyphae and fungal spores
Source: PubMed Central journal article supplement (PMC8635391; doi:10.1371/journal.pgen.1009924), 2021-11-17
Supplement: pgen.1009924.s010.pdf [file pgen.1009924.s010.pdf]

Supporting Information S10 Fig. Morphology of  $T_gOEhfb2::mrfp$  and immunochemical characterization of HFB2 secreted by aerial hyphae.

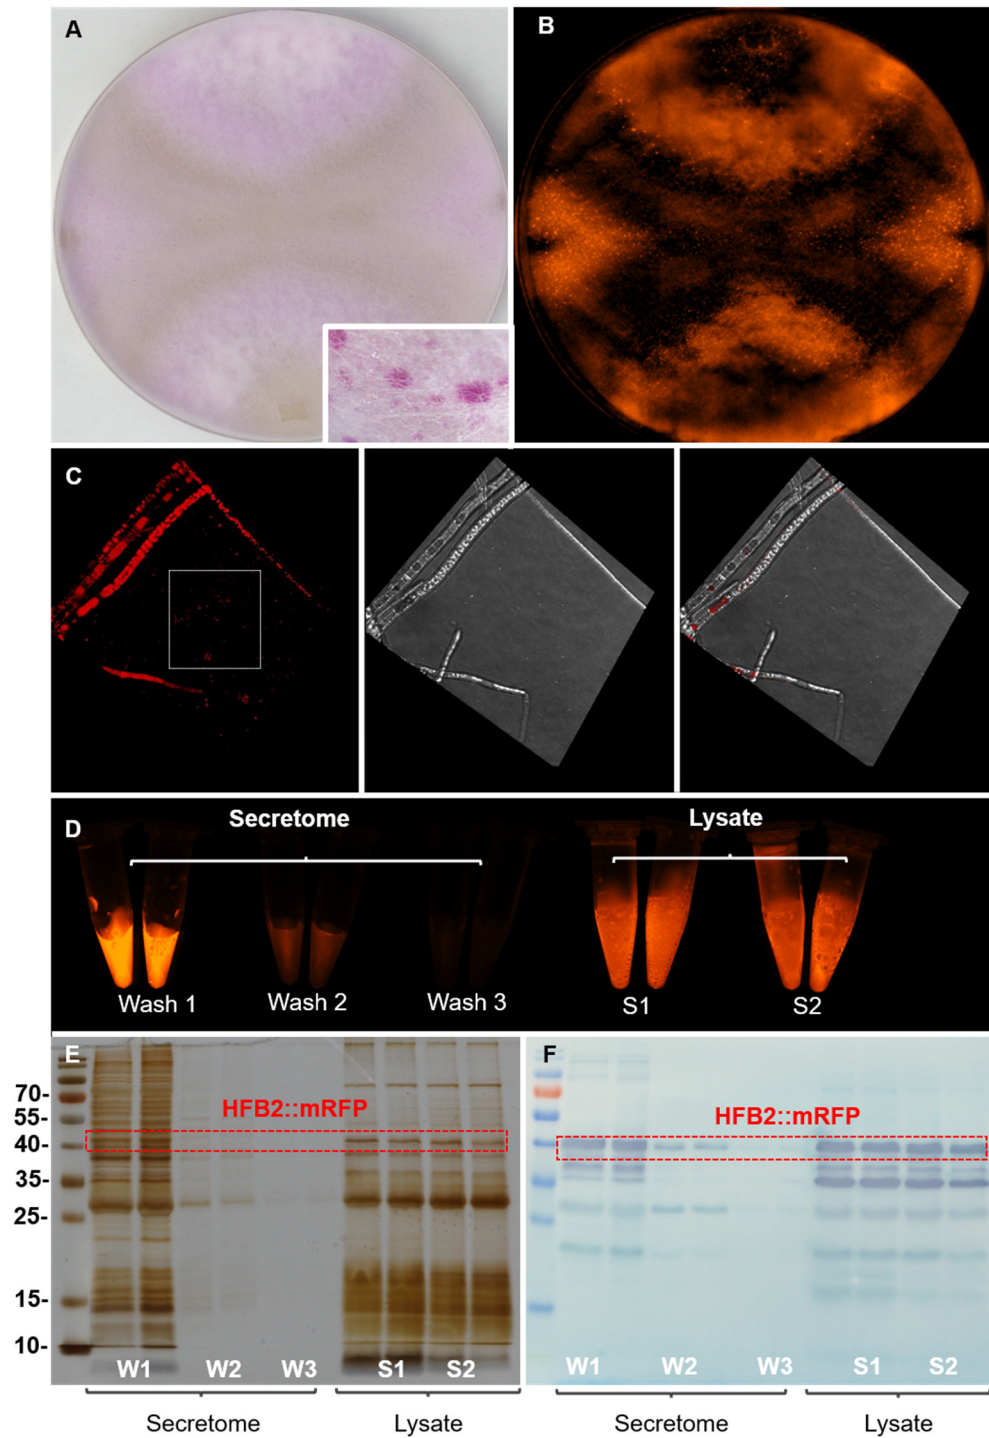

**Fig S10** Immunochemical characterization of HFB2 secreted by aerial hyphae of the "pink strain"  $T_gOEhfb2::mrfp$ . (A) Morphology of the strain after three weeks of incubation at 25 °C in darkness. The

insert in **(A)** shows a close-up view of the aerial hyphae. Note: the aerial mycelium of the wild-type *T. guizhouense* strain lives up to 10-14 days and then becomes autolyzed. **(B)** The same plate was imaged by a Bio-Rad ChemiDoc MP (Bio-Rad, USA) equipped with multiplex fluorescent channels. Bright dots correspond to guttation droplets filled with HFB2::mRFP fusion protein seen in the insert in **A**. **(C)** Intra- and extracellular HFB-enriched vesicles. Extracellular vesicles are abundantly observed if the hyphae of  $T_gOEhfb2::mrfp$  mechanically disrupted on the microscopy slide. **(D)** Qualitative detection of fluorescence (of HFB2::mRFP) in samples collected from the secretome and the lysate of culture shown in **(A)**. The secretome samples (W1-W3) were collected by washing the 21-d-old PDA culture three times with HPLC water. The lysate samples (S1-S2) were prepared by lysing the water-washed aerial hyphae two times by 1% SDS (dissolved in 50 mM Tris-HCl, pH 8.1). **(E)** and **(F)**, SDS-PAGE and immune blotting (WB) confirmation of the protein samples shown in **(A) – (D)**.
