# Supplementary material for: The pleiotropic functions of intracellular hydrophobins in aerial hyphae and fungal spores
Source: PubMed Central journal article supplement (PMC8635391; doi:10.1371/journal.pgen.1009924), 2021-11-17
Supplement: pgen.1009924.s014.pdf [file pgen.1009924.s014.pdf]

Supporting Information S14 Fig. Cell wall ultrastructure of HFB mutants of *Trichoderma*

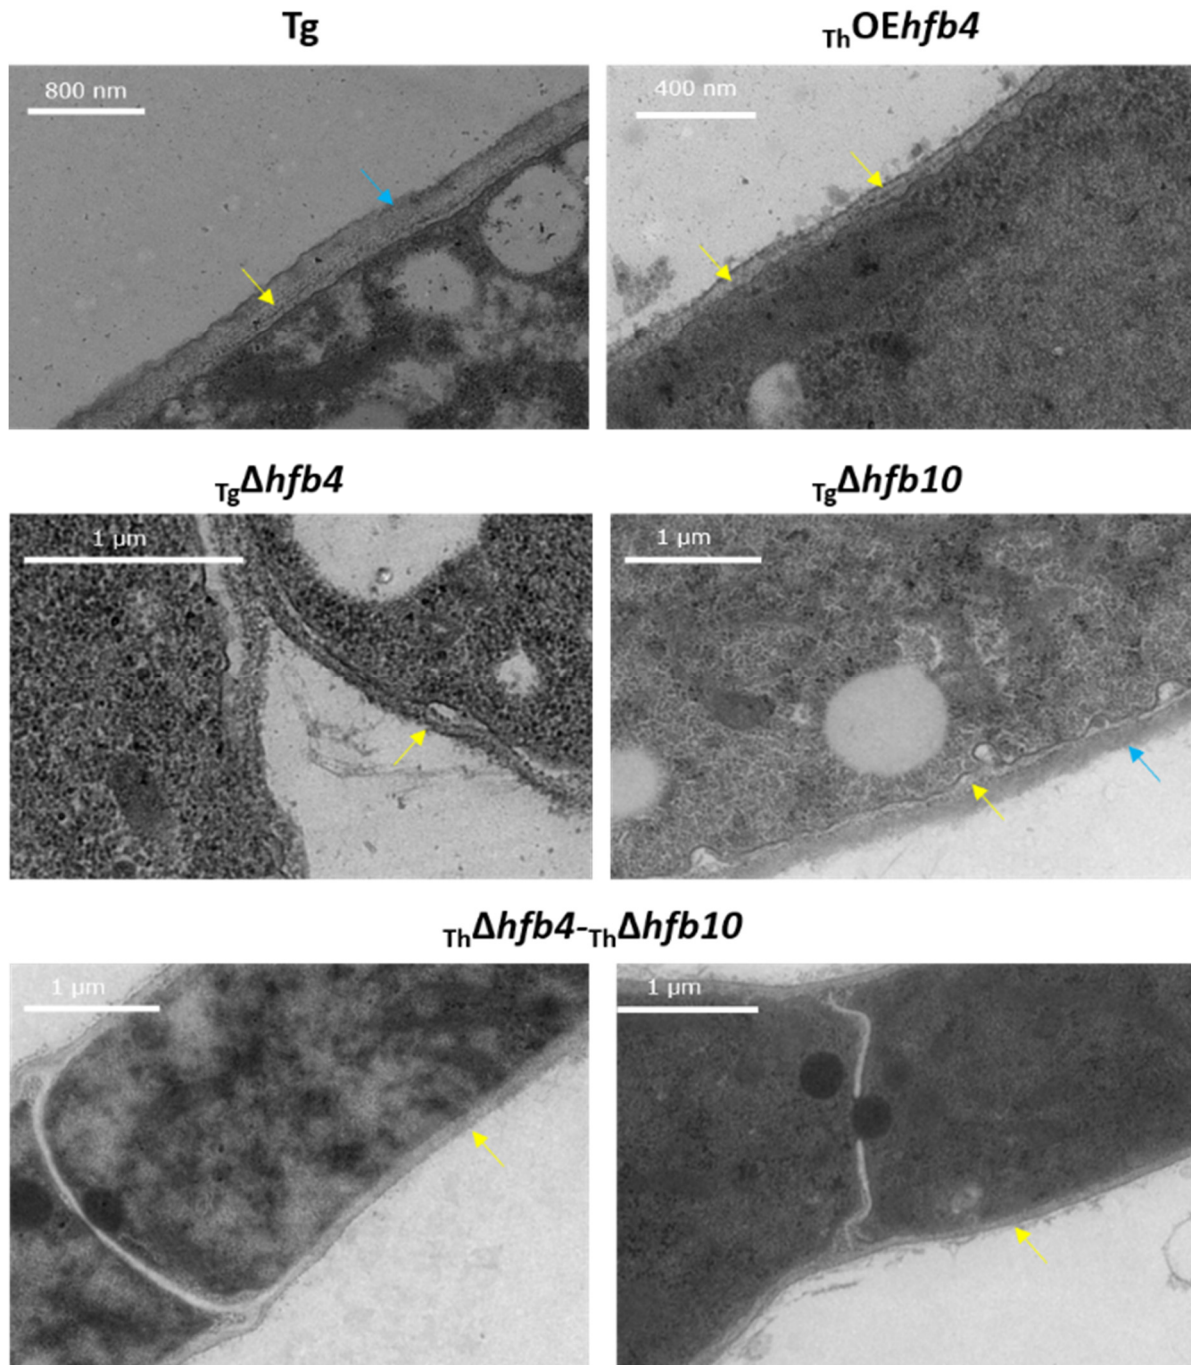

**Fig S14** Cell wall ultrastructure of HFB mutants of *Trichoderma*. Strains cultivated on PDA plates at 25 °C in darkness for 48 h. Yellow arrows point to the cell wall, and blue arrows indicate the extracellular matrix.
