# Supplementary material for: The pleiotropic functions of intracellular hydrophobins in aerial hyphae and fungal spores
Source: PubMed Central journal article supplement (PMC8635391; doi:10.1371/journal.pgen.1009924), 2021-11-17
Supplement: pgen.1009924.s015.pdf [file pgen.1009924.s015.pdf]

Supporting Information S15 Fig. Response of the wild type, HFB-deficient, and HFB-overexpressing strains of *T. guizhouense* to the conditions of the osmotic stress

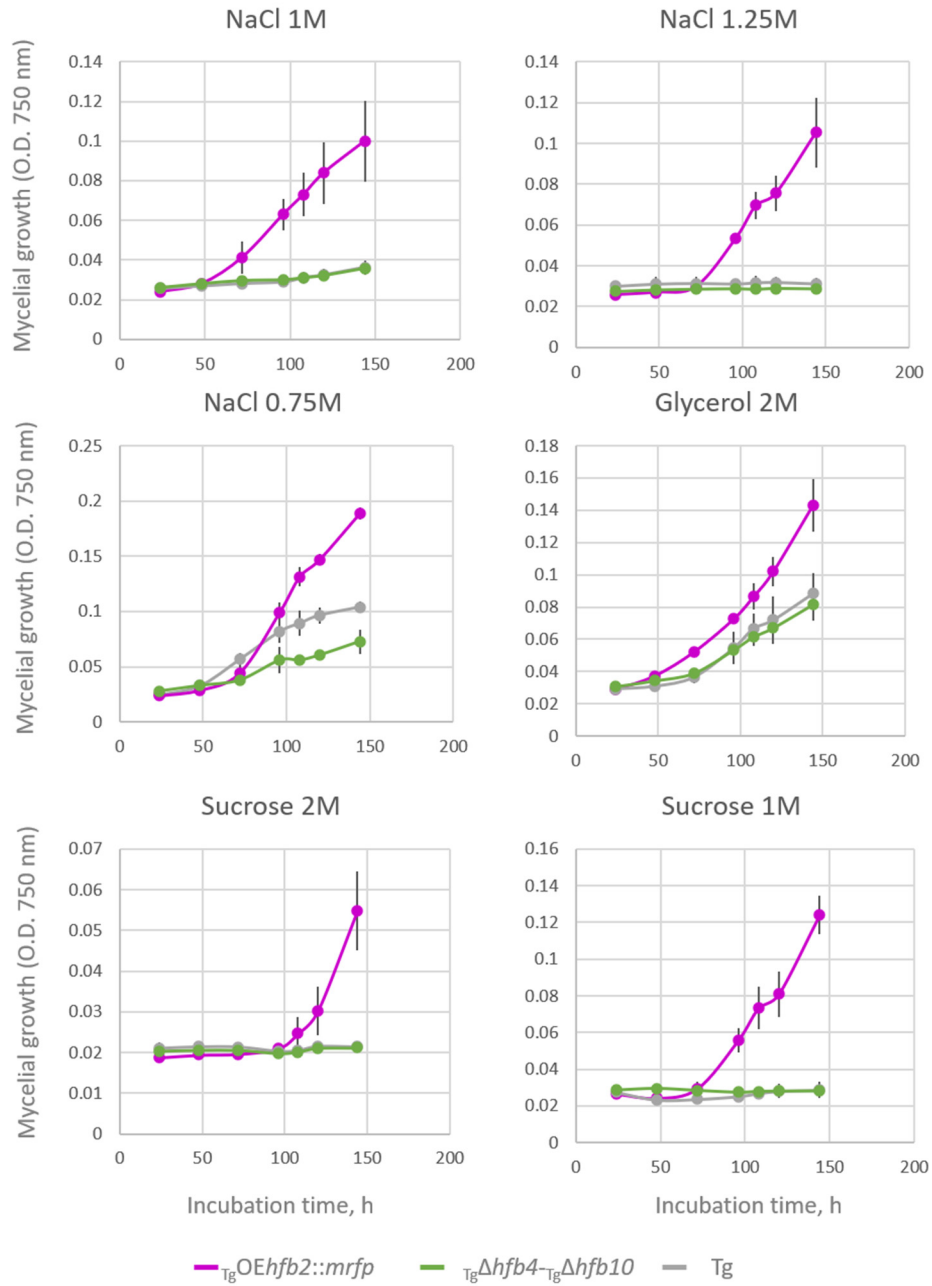

**Fig S15** For the testing the resistance to the osmotic stress, strains were inoculated in the glucose synthetic medium (9.89 mM KNO<sub>3</sub>, 7.35 mM KH<sub>2</sub>PO<sub>4</sub>, 6.7 mM KCl, 2.03 mM MgSO<sub>4</sub> × 7H<sub>2</sub>O, 0.9 mM CaCl<sub>2</sub>, 0.094 mM MnSO<sub>4</sub> × H<sub>2</sub>O, 0.048 mM ZnSO<sub>4</sub> × 7H<sub>2</sub>O, 0.18 mM FeSO<sub>4</sub> × 7H<sub>2</sub>O, 0.121 mM CoCl<sub>2</sub> × 6H<sub>2</sub>O, 1% glucose) supplemented with NaCl (0.75 M, 1 M, or 1.25 M), sucrose (1 M or 2 M) or 2 M glycerol as osmolytes. These experiments were performed in 96-well microplates inoculated with 10<sup>6</sup> spores/ml and incubated at 25°C in darkness. Each assay was repeated four times.
