# Supplementary material for: The pleiotropic functions of intracellular hydrophobins in aerial hyphae and fungal spores
Source: PubMed Central journal article supplement (PMC8635391; doi:10.1371/journal.pgen.1009924), 2021-11-17
Supplement: pgen.1009924.s019.pdf [file pgen.1009924.s019.pdf]

Supporting Information S19 Fig. Secondary growth of  $T_g\Delta hfb4$

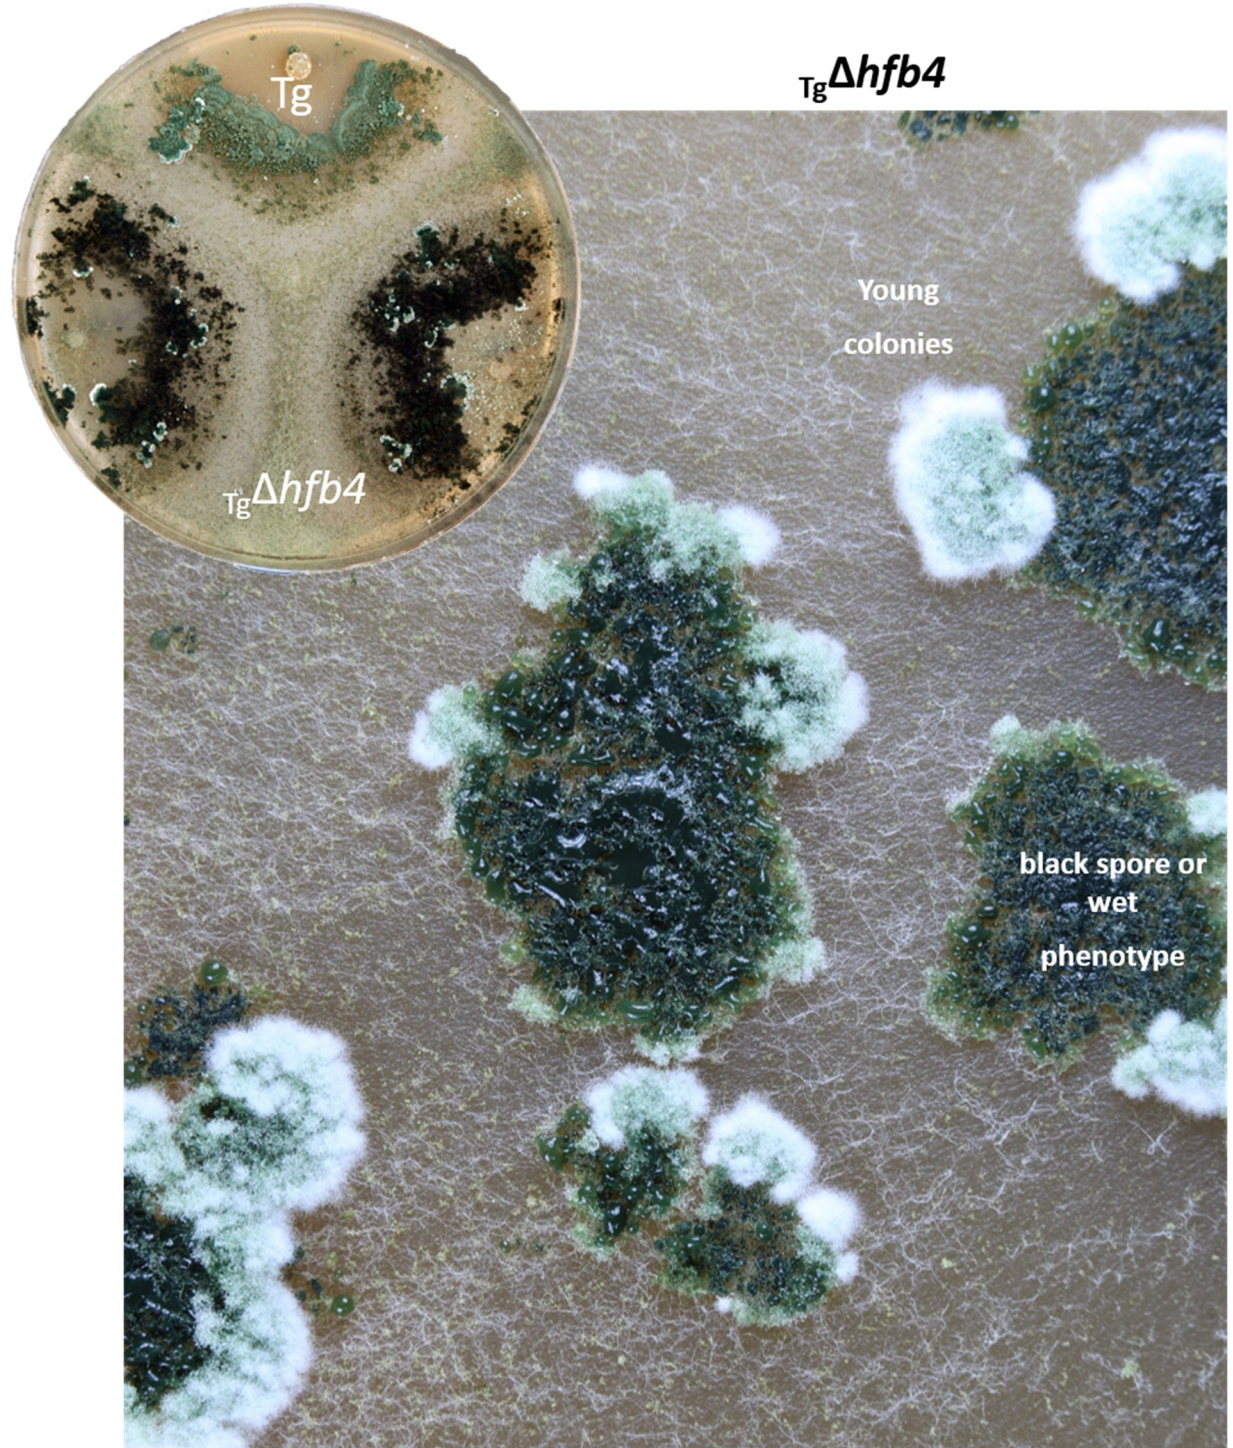

**Fig S19** “Black spore” or wetted phenotype of  $T_g\Delta hfb4$  mutants after two weeks of cultivation. Note the emergence of young colonies above autolyzed hyphae due to the altered dormancy control in this mutant.
